# Supplementary material for: Notch-Deficient Skin Induces a Lethal Systemic B-Lymphoproliferative Disorder by Secreting TSLP, a Sentinel for Epidermal Integrity
Source: PubMed Central journal article supplement (PMC2430908; doi:10.1371/journal.pbio.0060123), 2008-05-27
Supplement: pbio.0060123.st001.pdf [file pbio.0060123.st001.pdf]

**Table S1**

| <b>Genotype</b> | <b>Weight<br/>(g)</b> | <b>Spleen mass<br/>(g)</b>     | <b>Liver mass<br/>(g)</b> | <b>Lymph<br/>Nodes</b> |
|-----------------|-----------------------|--------------------------------|---------------------------|------------------------|
| <b>PSDCKO</b>   | <b>6.8 ± 2.0</b>      | <b>0.22 ± 0.03<sup>a</sup></b> | <b>0.53 ± 0.05</b>        | <b>Enlarged</b>        |
| <b>N1N2CKO</b>  | <b>6.6 ± 2.2</b>      | <b>0.20 ± 0.03<sup>a</sup></b> | <b>0.56 ± 0.04</b>        | <b>Enlarged</b>        |
| <b>Wt</b>       | <b>10.6 ± 0.6</b>     | <b>0.08 ± 0.02</b>             | <b>0.63 ± 0.09</b>        | <b>Normal</b>          |
