# Supplementary material for: Notch-Deficient Skin Induces a Lethal Systemic B-Lymphoproliferative Disorder by Secreting TSLP, a Sentinel for Epidermal Integrity
Source: PubMed Central journal article supplement (PMC2430908; doi:10.1371/journal.pbio.0060123), 2008-05-27
Supplement: pbio.0060123.st002.pdf [file pbio.0060123.st002.pdf]

Table S2

| Gene Symbol   | Gene Title                                                                                   | Log(Ratio)<br>N1CKO/Wt | Log(Ratio)<br>N1N2CKO/Wt | Log(Ratio)<br>PSDCKO/Wt |
|---------------|----------------------------------------------------------------------------------------------|------------------------|--------------------------|-------------------------|
| 2310034C09Rik | RIKEN cDNA 2310034C09 gene                                                                   | 0.38                   | 1.688                    | 1.92                    |
| Cxcl2         | chemokine (C-X-C motif) ligand 2                                                             | 0.335                  | 1.076                    | 1.782                   |
| Tslp          | thymic stromal lymphopoietin                                                                 | 0.46                   | 1.64                     | 1.662                   |
| Krt2-6b       | keratin complex 2, basic, gene 6g                                                            | 0.424                  | 1.557                    | 1.516                   |
| Mmp9          | matrix metalloproteinase 9                                                                   | 0.461                  | 1.261                    | 1.306                   |
| Mmp8          | matrix metalloproteinase 8                                                                   | 0.26                   | 1.523                    | 1.29                    |
| Il6           | interleukin 6                                                                                | 0.391                  | 1.43                     | 1.255                   |
| Il6           | interleukin 6                                                                                | 0.346                  | 1.43                     | 1.255                   |
| 1190003K14Rik | CD177 antigen                                                                                | 0.317                  | 1.398                    | 1.254                   |
| Ccl3          | chemokine (C-C motif) ligand 3                                                               | 0.281                  | 0.998                    | 1.226                   |
| Adam8         | a disintegrin and metalloprotease domain 8                                                   | 0.484                  | 1.142                    | 1.17                    |
| Hsd11b1       | 11 beta-hydroxysteroid dehydrogenase-1                                                       | 0.315                  | 1.099                    | 1.075                   |
| Hsd11b1       | 11 beta-hydroxysteroid dehydrogenase-1                                                       | 0.205                  | 1.099                    | 1.075                   |
| Hsd11b1       | 11 beta-hydroxysteroid dehydrogenase-1                                                       | 0.193                  | 1.099                    | 1.075                   |
| Cxcl1         | chemokine (C-X-C motif) ligand 1                                                             | 0.477                  | 1.122                    | 1.064                   |
| Clec4e        | C-type lectin domain family 4, member e                                                      | 0.439                  | 1.123                    | 1.061                   |
| Reg3g         | regenerating islet-derived 3 gamma                                                           | 0.416                  | 1.358                    | 1.06                    |
| Gzmb          | granzyme B                                                                                   | 0.405                  | 0.972                    | 1.055                   |
| Olfm4         | olfactomedin 4                                                                               | 0.31                   | 1.384                    | 1.019                   |
| Prok2         | prokineticin 2                                                                               | 0.228                  | 1.418                    | 1.014                   |
| Pla1a         | phospholipase A1 member A                                                                    | 0.182                  | 0.85                     | 1.003                   |
| Ms4a6c        | membrane-spanning 4-domains, subfamily A, member 6C                                          | 0.443                  | 1.055                    | 0.999                   |
| Mrc1          | mannose receptor, C type 1                                                                   | 0.469                  | 1.133                    | 0.955                   |
| Prg4          | proteoglycan 4                                                                               | 0.405                  | 0.939                    | 0.955                   |
| Krt1-16       | keratin complex 1, acidic, gene 16                                                           | 0.363                  | 0.898                    | 0.955                   |
| Gpr65         | G-protein coupled receptor 25                                                                | 0.458                  | 0.962                    | 0.953                   |
| Akr1b8        | aldo-keto reductase family 1, member B8                                                      | 0.484                  | 0.889                    | 0.94                    |
| Fpr-rs2       | Mus musculus N-formylpeptide receptor-like 2 gene                                            | 0.301                  | 0.992                    | 0.912                   |
| 1810033B17Rik | RIKEN cDNA 1810033B17 gene                                                                   | 0.434                  | 1.145                    | 0.895                   |
| Tcra          | 2 days neonate thymus thymic cells cDNA, RIKEN full-length enriched library                  | 0.482                  | 0.751                    | 0.893                   |
| Bcl3          | B-cell leukemia/lymphoma 3                                                                   | 0.475                  | 0.788                    | 0.891                   |
| LOC545051     | similar to T-cell receptor alpha chain C region                                              | 0.458                  | 0.782                    | 0.88                    |
| Ccl6          | chemokine (C-C motif) ligand 6                                                               | 0.332                  | 0.72                     | 0.879                   |
| Sod3          | superoxide dismutase 3, extracellular                                                        | 0.394                  | 0.79                     | 0.878                   |
| 2410039E07Rik | RIKEN cDNA 2410039E07 gene                                                                   | 0.252                  | 0.923                    | 0.877                   |
| Lcp2          | lymphocyte cytosolic protein 2                                                               | 0.385                  | 0.971                    | 0.864                   |
| Tcfec         | transcription factor EC                                                                      | 0.185                  | 0.873                    | 0.863                   |
| Ctla2a        | trophoblast specific protein beta                                                            | 0.327                  | 0.723                    | 0.861                   |
| Il23a         | interleukin 23, alpha subunit p19                                                            | 0.415                  | 0.752                    | 0.86                    |
| Mmp12         | matrix metalloproteinase 12                                                                  | 0.251                  | 0.976                    | 0.847                   |
| Serpina3n     | serine (or cysteine) proteinase inhibitor, clade A, member 3N                                | 0.376                  | 0.685                    | 0.842                   |
| Ltb           | lymphotoxin B                                                                                | 0.432                  | 0.847                    | 0.841                   |
| Slc2a1        | solute carrier family 2 (facilitated glucose transporter), member 1                          | 0.469                  | 0.753                    | 0.838                   |
| Klk1          | kallikrein 9                                                                                 | 0.194                  | 0.951                    | 0.824                   |
| Bcl2a1d       | B-cell leukemia/lymphoma 2 related protein A1a                                               | 0.421                  | 0.852                    | 0.823                   |
| 8430417A20Rik | RIKEN cDNA 8430417A20 gene                                                                   | 0.416                  | 0.528                    | 0.823                   |
| Il18r1        | interleukin 18 receptor 1                                                                    | 0.358                  | 0.743                    | 0.821                   |
| Trp73         | Mus musculus p73 gene, exons 5 through 14 and partial cds.                                   | 0.35                   | 0.586                    | 0.821                   |
| Fcgr2b        | Mouse beta Fc receptor type II (FCRII) gene, complete cds.                                   | 0.328                  | 0.982                    | 0.819                   |
| Il7r          | interleukin 7 receptor                                                                       | 0.351                  | 0.718                    | 0.815                   |
| Msr1          | macrophage scavenger receptor 1                                                              | 0.423                  | 0.898                    | 0.81                    |
| Fabp9         | fatty acid binding protein 9, testis                                                         | -0.359                 | -0.648                   | -0.805                  |
| 4833411O04Rik | RIKEN cDNA 2600010E01 gene                                                                   | -0.35                  | -0.672                   | -0.807                  |
| Srms          | src-related kinase lacking C-terminal regulatory tyrosine and N-terminal myristylation sites | -0.202                 | -0.831                   | -0.808                  |
| Cldn8         | claudin 8                                                                                    | -0.347                 | -0.695                   | -0.808                  |
| Slc17a1       | solute carrier family 17 (sodium phosphate), member 1                                        | -0.41                  | -0.566                   | -0.823                  |
| Elf5          | E74-like factor 5                                                                            | -0.215                 | -0.627                   | -0.848                  |
| Slc40a1       | solute carrier family 40 (iron-regulated transporter), member 1                              | -0.343                 | -0.801                   | -0.851                  |
| Glr3b         | glycine receptor, beta subunit                                                               | -0.387                 | -0.753                   | -0.865                  |
| Ces3          | carboxylesterase 3                                                                           | -0.235                 | -0.52                    | -0.924                  |
| Ogn           | osteoglycin                                                                                  | -0.189                 | -0.552                   | -0.952                  |
| Ogn           | osteoglycin                                                                                  | -0.214                 | -0.552                   | -0.952                  |
| 2310015J09Rik | RIKEN cDNA 2310015J09 gene                                                                   | -0.492                 | -1.156                   | -1.008                  |
| Tnfrsf13c     | tumor necrosis factor receptor superfamily, member 13c                                       | -0.353                 | -0.989                   | -1.018                  |
| Slc6a19       | solute carrier family 6 (neurotransmitter transporter), member 19                            | -0.479                 | -0.833                   | -1.05                   |
| Crym          | crystallin, mu                                                                               | -0.338                 | -1.043                   | -1.052                  |
| 2310032F03Rik | RIKEN cDNA 2310032F03 gene                                                                   | -0.41                  | -0.992                   | -1.061                  |
| Bmp8a         | 3-oxoacid CoA transferase 2A                                                                 | -0.449                 | -1.172                   | -1.068                  |
| Mt4           | metallothionein 4                                                                            | -0.366                 | -1.118                   | -1.101                  |
| Tchhl1        | trichohyalin-like 1                                                                          | -0.498                 | -1.09                    | -1.131                  |
| 4733401L19Rik | RIKEN cDNA 4733401L19 gene                                                                   | -0.446                 | -1.101                   | -1.19                   |
| Acsm3         | acyl-CoA synthetase medium-chain family member 3                                             | -0.473                 | -1.396                   | -1.37                   |
| Fbp1          | fructose biphosphatase 1                                                                     | -0.343                 | -1.237                   | -1.434                  |
