# Supplementary material for: Notch-Deficient Skin Induces a Lethal Systemic B-Lymphoproliferative Disorder by Secreting TSLP, a Sentinel for Epidermal Integrity
Source: PubMed Central journal article supplement (PMC2430908; doi:10.1371/journal.pbio.0060123), 2008-05-27
Supplement: pbio.0060123.st004.pdf [file pbio.0060123.st004.pdf]

Table S4

| Probe ID  | Symbol  | Definition                                                                               | p -value<br>(PSDCKO/Wt) | GFoldChange<br>(PSDCKO/Wt) | Log(ratio)<br>(PSDCKO/Wt) |
|-----------|---------|------------------------------------------------------------------------------------------|-------------------------|----------------------------|---------------------------|
| 6290093   | Alox12  | arachidonate 12-lipoxygenase (Alox12).                                                   | <b>0.000001</b>         | <b>-19.03</b>              | <b>-1.279</b>             |
| 4150397   | Asah3   | N-acylsphingosine amidohydrolase (alkaline ceramidase) 3 (Asah3).                        | <b>0.000001</b>         | <b>-6.96</b>               | <b>-0.843</b>             |
| 2060064   | Alox12e | arachidonate lipoxygenase, epidermal (Alox12e).                                          | <b>0.000176</b>         | <b>-5.75</b>               | <b>-0.760</b>             |
| 3170427   | Adh1    | alcohol dehydrogenase 1 (class I) (Adh1).                                                | <b>0.001750</b>         | <b>-3.37</b>               | <b>-0.528</b>             |
| 5340746   | Elovl6  | ELOVL family member 6, elongation of long chain fatty acids (yeast) (Elovl6).            | <b>0.001571</b>         | <b>-2.93</b>               | <b>-0.467</b>             |
| 2360309   | Liph    | lipase, member H (Liph).                                                                 | <b>0.001263</b>         | <b>-2.55</b>               | <b>-0.407</b>             |
| 2630372   | Aloxe3  | arachidonate lipoxygenase 3 (Aloxe3).                                                    | <b>0.001286</b>         | <b>-2.32</b>               | <b>-0.365</b>             |
| 101510348 | Alox12  | arachidonate 12-lipoxygenase (Alox12).                                                   | <b>0.000002</b>         | <b>-2.21</b>               | <b>-0.345</b>             |
| 2690050   | Liph    | lipase, member H (Liph).                                                                 | <b>0.009203</b>         | <b>-2.19</b>               | <b>-0.341</b>             |
| 2680441   | Scd1    | stearoyl-Coenzyme A desaturase 1 (Scd1)                                                  | 0.017313                | -2.19                      | -0.340                    |
| 4760138   | Elovl1  | elongation of very long chain fatty acids (FEN1/Elo2, SUR4/Elo3, yeast)-like 1 (Elovl1). | <b>0.005893</b>         | <b>-2.03</b>               | <b>-0.308</b>             |
| 105360215 | Lipl3   | lipase-like, ab-hydrolase domain containing 3                                            | <b>0.000253</b>         | <b>-1.91</b>               | <b>-0.280</b>             |
| 3930707   | Sgpp1   | sphingosine-1-phosphate phosphatase 1 (Sgpp1).                                           | <b>0.000093</b>         | <b>-1.85</b>               | <b>-0.267</b>             |
| 730193    | Ptgs1   | prostaglandin-endoperoxide synthase 1 (Ptgs1).                                           | <b>0.003103</b>         | <b>-1.63</b>               | <b>-0.213</b>             |
| 6450195   | Ptgs1   | prostaglandin-endoperoxide synthase 1 (Ptgs1).                                           | <b>0.001999</b>         | <b>-1.46</b>               | <b>-0.164</b>             |
| 1780273   | Ptgs1   | prostaglandin-endoperoxide synthase 1 (Ptgs1).                                           | 0.021620                | -1.43                      | -0.155                    |
| 1410309   | Smpd1   | sphingomyelin phosphodiesterase 1, acid lysosomal (Smpd1).                               | 0.111435                | -1.39                      | -0.142                    |
| 5220333   | Elovl4  | elongation of very long chain fatty acids (FEN1/Elo2, SUR4/Elo3, yeast)-like 4 (Elovl4). | 0.625118                | -1.07                      | -0.028                    |
| 6590059   | Lipl2   | lipase-like, ab-hydrolase domain containing 2                                            | 0.814034                | -1.06                      | -0.027                    |
| 6860050   | Elovl3  | elongation of very long chain fatty acids (FEN1/Elo2, SUR4/Elo3, yeast)-like 3 (Elovl3). | 0.827319                | -1.05                      | -0.022                    |
| 2450019   | Elovl1  | elongation of very long chain fatty acids (FEN1/Elo2, SUR4/Elo3, yeast)-like 1 (Elovl1). | 0.899655                | -1.03                      | -0.012                    |
| 70458     | Lipl2   | lipase-like, ab-hydrolase domain containing 2                                            | 0.629916                | -1.03                      | -0.012                    |
| 2370358   | Tslpr   | thymic stromal-derived lymphopoietin, receptor (Tslpr).                                  | 0.831755                | -1.01                      | -0.004                    |
| 1990500   | Tslp    | thymic stromal lymphopoietin (Tslp).                                                     | 0.980370                | 1.00                       | 0.001                     |
| 5550717   | Smpd1   | sphingomyelin phosphodiesterase 1, acid lysosomal (Smpd1).                               | 0.841169                | 1.04                       | 0.017                     |
| 106200484 | Elovl3  | elongation of very long chain fatty acids (FEN1/Elo2, SUR4/Elo3, yeast)-like 3 (Elovl3). | 0.191433                | 1.06                       | 0.025                     |
| 4810181   | Sult2b1 | sulfotransferase family, cytosolic, 2B, member 1 (Sult2b1).                              | 0.713639                | 1.07                       | 0.028                     |
| 520164    | Smpd3   | sphingomyelin phosphodiesterase 3, neutral (Smpd3).                                      | 0.491531                | 1.16                       | 0.063                     |
| 3360484   | Sult2b1 | sulfotransferase family, cytosolic, 2B, member 1 (Sult2b1).                              | 0.124677                | 1.50                       | 0.177                     |
| 730408    | Tslp    | thymic stromal lymphopoietin (Tslp).                                                     | <b>0.000116</b>         | <b>19.79</b>               | <b>1.296</b>              |
