# Supplementary material for: Notch-Deficient Skin Induces a Lethal Systemic B-Lymphoproliferative Disorder by Secreting TSLP, a Sentinel for Epidermal Integrity
Source: PLoS Biol. 2008 May 27;6(5):e123. doi: 10.1371/journal.pbio.0060123 (PMC2430908; doi:10.1371/journal.pbio.0060123)
Supplement: Table S3 — Comprehensive (A) antigen and (B) autoimmune analysis on sera collected from P14 mutant (N1N2CKO; n = 3) and wild-type (n = 3) animals does not identify any other factor besides TSLP that could potentially explain B-LPD in the mutant animals. The antigens with significantly higher levels in mutant serum are marked (values in red). Note that the least detectable dose for each factor is calculated as three standard deviations above the average value obtained measuring 20 blank samples. Therefore, values below the least detectable dose are below accurate detection range. Rules Based Medicine laboratory cutoff values for autoimmune analysis signify the upper limits of normal ratios for each factor measured. (46 KB PDF) [file pbio.0060123.st003.pdf]

Table S3

A

| Antigen:               |           | Apo A1<br>(Apolipoprotein A1) | Beta-2<br>Microglobulin | Calbindin      | CD40        | CD40 Ligand | Clusterin     | CRP<br>(C Reactive Protein) | Cystatin-C    | EGF<br>(Epidermal Growth Factor) | Endothelin-1 | Eotaxin     | Factor VII    |
|------------------------|-----------|-------------------------------|-------------------------|----------------|-------------|-------------|---------------|-----------------------------|---------------|----------------------------------|--------------|-------------|---------------|
| Least Detectable Dose: |           | ug/mL<br>10                   | ug/mL<br>0.89           | ng/mL<br>0.043 | pg/mL<br>12 | pg/mL<br>92 | ug/mL<br>0.55 | ug/mL<br>0.83               | ng/mL<br><9.9 | pg/mL<br>39                      | pg/mL<br>67  | pg/mL<br>12 | ng/mL<br>0.96 |
| Samples:               | Mutant    | 45                            | <LOW>                   | 104            | 668         | 713         | 125           | 1.3                         | 2000          | 16                               | 35           | 831         | 0.97          |
| (Average Value)        | Wild Type | 50                            | <LOW>                   | 40             | 542         | 639         | 76            | 1.5                         | 1250          | 13                               | 30           | 774         | 0.81          |

| Antigen:               |           | FGF-9<br>(Fibroblast Growth Factor-9) | FGF-basic<br>(Fibroblast Growth Factor-basic) | Fibrinogen   | GCP-2<br>(Granulocyte Chemotactic Protein-2) | GM-CSF<br>(Granulocyte Macrophage-Colony Stimulating Factor) | Growth Hormone | GST-alpha<br>(Glutathione S-Transferase alpha) | GST-Mu       | Haptoglobin   | IFN-gamma<br>(Interferon-gamma) | IgA<br>(Immunoglobulin A) | IL-10<br>(Interleukin-10) |
|------------------------|-----------|---------------------------------------|-----------------------------------------------|--------------|----------------------------------------------|--------------------------------------------------------------|----------------|------------------------------------------------|--------------|---------------|---------------------------------|---------------------------|---------------------------|
| Least Detectable Dose: |           | ng/mL<br>0.99                         | ng/mL<br>0.58                                 | ug/mL<br>170 | ng/mL<br>0.025                               | pg/mL<br>8.7                                                 | ng/mL<br>4.2   | ng/mL<br>0.42                                  | ng/mL<br>3.0 | ug/mL<br>0.64 | pg/mL<br>68                     | ug/mL<br>1.9              | pg/mL<br>109              |
| Samples:               | Mutant    | <LOW>                                 | 2.7                                           | 224          | 28                                           | <LOW>                                                        | 25             | <LOW>                                          | <LOW>        | 93            | <LOW>                           | 6.7                       | 432                       |
| (Average Value)        | Wild Type | <LOW>                                 | 1.9                                           | 60           | 21                                           | <LOW>                                                        | 36             | <LOW>                                          | <LOW>        | 26            | <LOW>                           | 6.7                       | 412                       |

| Antigen:               |           | IL-11<br>(Interleukin-11) | IL-12p70<br>(Interleukin-12p70) | IL-17<br>(Interleukin-17) | IL-18<br>(Interleukin-18) | IL-1alpha<br>(Interleukin-1alpha) | IL-1beta<br>(Interleukin-1beta) | IL-2<br>(Interleukin-2) | IL-3<br>(Interleukin-3) | IL-4<br>(Interleukin-4) | IL-5<br>(Interleukin-5) | IL-6<br>(Interleukin-6) | IL-7<br>(Interleukin-7) |
|------------------------|-----------|---------------------------|---------------------------------|---------------------------|---------------------------|-----------------------------------|---------------------------------|-------------------------|-------------------------|-------------------------|-------------------------|-------------------------|-------------------------|
| Least Detectable Dose: |           | pg/mL<br>87               | ng/mL<br>0.57                   | ng/mL<br>0.15             | ng/mL<br>0.67             | pg/mL<br>45                       | ng/mL<br>0.45                   | pg/mL<br>67             | pg/mL<br>21             | pg/mL<br>74             | ng/mL<br>0.19           | pg/mL<br>14             | ng/mL<br>0.03           |
| Samples:               | Mutant    | <LOW>                     | <LOW>                           | <LOW>                     | 1.5                       | 7400                              | 1.8                             | <LOW>                   | <LOW>                   | <LOW>                   | 0.69                    | <LOW>                   | <LOW>                   |
| (Average Value)        | Wild Type | <LOW>                     | <LOW>                           | <LOW>                     | 1.1                       | 1620                              | 1.5                             | <LOW>                   | <LOW>                   | <LOW>                   | 0.43                    | <LOW>                   | <LOW>                   |

| Antigen:               |           | Insulin       | IP-10<br>(Inducible Protein-10) | KC/GROalpha<br>(Melanoma Growth Stimulatory Activity Protein) | Leptin         | LIF (Leukemia Inhibitory Factor) | Lymphotactin | MCP-1<br>(Monocyte Chemoattractant Protein-1) | MCP-3<br>(Monocyte Chemoattractant Protein-3) | MCP-5<br>(Monocyte Chemoattractant Protein-5) | M-CSF<br>(Macrophage-Colony Stimulating Factor) | MDC<br>(Macrophage-Derived Chemokine) | MIP-1alpha<br>(Macrophage Inflammatory Protein-1alpha) |
|------------------------|-----------|---------------|---------------------------------|---------------------------------------------------------------|----------------|----------------------------------|--------------|-----------------------------------------------|-----------------------------------------------|-----------------------------------------------|-------------------------------------------------|---------------------------------------|--------------------------------------------------------|
| Least Detectable Dose: |           | uIU/mL<br>1.0 | pg/mL<br>40                     | ng/mL<br>0.17                                                 | ng/mL<br>0.096 | pg/mL<br>44                      | pg/mL<br>85  | pg/mL<br>17                                   | pg/mL<br>31                                   | pg/mL<br>46                                   | ng/mL<br>0.018                                  | pg/mL<br>22                           | ng/mL<br>0.23                                          |
| Samples:               | Mutant    | 1.4           | 95                              | <LOW>                                                         | 1.1            | 358                              | 239          | 591                                           | 1740                                          | 151                                           | 6.8                                             | 2020                                  | 0.74                                                   |
| (Average Value)        | Wild Type | 1.0           | 123                             | <LOW>                                                         | 3.8            | 252                              | 163          | 166                                           | 371                                           | 31                                            | 8.1                                             | 735                                   | 0.32                                                   |

| Antigen:               |           | MIP-1beta<br>(Macrophage Inflammatory Protein-1beta) | MIP-1gamma<br>(Macrophage Inflammatory Protein-1gamma) | MIP-2<br>(Macrophage Inflammatory Protein-2) | MIP-3beta<br>(Macrophage Inflammatory Protein-3beta) | MMP-9<br>(Matrix Metalloproteinase-9) | MPO<br>(Myeloperoxidase) | Myoglobin   | NGAL         | OSM<br>(Oncostatin M) | Osteopontin   | RANTES<br>(Regulation Upon Activation, Normal T-Cell Expressed and Secreted) | SAP<br>(Serum Amyloid P) |
|------------------------|-----------|------------------------------------------------------|--------------------------------------------------------|----------------------------------------------|------------------------------------------------------|---------------------------------------|--------------------------|-------------|--------------|-----------------------|---------------|------------------------------------------------------------------------------|--------------------------|
| Least Detectable Dose: |           | pg/mL<br>78                                          | ng/mL<br>0.074                                         | pg/mL<br>7.2                                 | ng/mL<br>0.47                                        | ng/mL<br>10                           | ng/mL<br>0.95            | ng/mL<br>24 | ng/mL<br>5.8 | ng/mL<br>0.13         | ng/mL<br><4.0 | pg/mL<br>48                                                                  | ug/mL<br>5.4             |
| Samples:               | Mutant    | 90                                                   | 26                                                     | 26                                           | <LOW>                                                | 624                                   | 185                      | 35          | <LOW>        | 0.097                 | 720           | <LOW>                                                                        | 16                       |
| (Average Value)        | Wild Type | 56                                                   | 11                                                     | 26                                           | <LOW>                                                | 153                                   | 58                       | 16          | <LOW>        | 0.026                 | 498           | <LOW>                                                                        | 18                       |

| Antigen:               |           | SCF<br>(Stem Cell Factor) | SGOT<br>(Serum Glutamic-Oxaloacetic Transaminase) | TIMP-1<br>(Tissue Inhibitor of Metalloproteinase Type-1) | Tissue Factor | TNF-alpha<br>(Tumor Necrosis Factor-alpha) | TPO<br>(Thrombopoietin) | VCAM-1<br>(Vascular Cell Adhesion Molecule-1) | VEGF<br>(Vascular Endothelial Cell Growth Factor) | vWF (von Willebrand Factor) | TSLP<br>(thymic stromal lymphopoietin) |
|------------------------|-----------|---------------------------|---------------------------------------------------|----------------------------------------------------------|---------------|--------------------------------------------|-------------------------|-----------------------------------------------|---------------------------------------------------|-----------------------------|----------------------------------------|
| Least Detectable Dose: |           | pg/mL<br>75               | ug/mL<br>1.9                                      | ng/mL<br>0.18                                            | ng/mL<br>0.52 | ng/mL<br>0.14                              | ng/mL<br>2.7            | ng/mL<br>19                                   | pg/mL<br>38                                       | ng/mL<br>99                 | pg/mL<br>10                            |
| Samples:               | Mutant    | 295                       | <LOW>                                             | 14                                                       | 2.5           | 0.055                                      | 15                      | 2490                                          | 428                                               | 131                         | 52000                                  |
| (Average Value)        | Wild Type | 218                       | <LOW>                                             | 4.3                                                      | 2.9           | 0.037                                      | 15                      | 1800                                          | 290                                               | 141                         | <LOW>                                  |

B

| Autoimmune Serology: |           | Beta-2<br>Glycoprotein Antibody | Insulin<br>Antibody | Jo-1 (histidyl-RNA synthetase)<br>Antibody | Mitochondrial<br>Antibody | MPO<br>(Myeloperoxidase)<br>Antibody | pCNA<br>(Proliferating Cell Nuclear Antigen)<br>Antibody | Proteinase 3<br>Antibody | Ribosomal P<br>Antibody | RNP<br>(Ribonuclear Protein)<br>Antibody | SCL-70<br>(Scleroderma-70)<br>Antibody | Smith<br>Antibody | SSA (Sjogren's Syndrome A)<br>Antibody | SSB (Sjogren's Syndrome B)<br>Antibody |
|----------------------|-----------|---------------------------------|---------------------|--------------------------------------------|---------------------------|--------------------------------------|----------------------------------------------------------|--------------------------|-------------------------|------------------------------------------|----------------------------------------|-------------------|----------------------------------------|----------------------------------------|
| RBM Mouse Cutoff:    |           | RBM Ratio<br>7                  | RBM Ratio<br>2.60   | RBM Ratio<br>1.100                         | RBM Ratio<br>4            | RBM Ratio<br>4                       | RBM Ratio<br>2.20                                        | RBM Ratio<br>2.50        | RBM Ratio<br>2.20       | RBM Ratio<br>6                           | RBM Ratio<br>6                         | RBM Ratio<br>2    | RBM Ratio<br>0.77                      | RBM Ratio<br>2.30                      |
| Samples:             | Mutant    | 2                               | 0.96                | 1                                          | 0                         | 0                                    | 1                                                        | 1.0                      | 1                       | 2                                        | 2                                      | 1                 | 0.00                                   | 0.85                                   |
| (Average value)      | Wild Type | 1                               | 0.77                | 0                                          | 1                         | 0                                    | 1                                                        | 0.9                      | 0                       | 1                                        | 1                                      | 1                 | -1.25                                  | 0.85                                   |
